# Supplementary material
Source: publisher site journal article supplement (https://www.dovepress.com/article/581527)
Supplement: Supplementary file 1 [file 581527_Supplementary%20Material.docx]

**Supplementary Figure S1.** Flowchart of literature retrieval and screening.


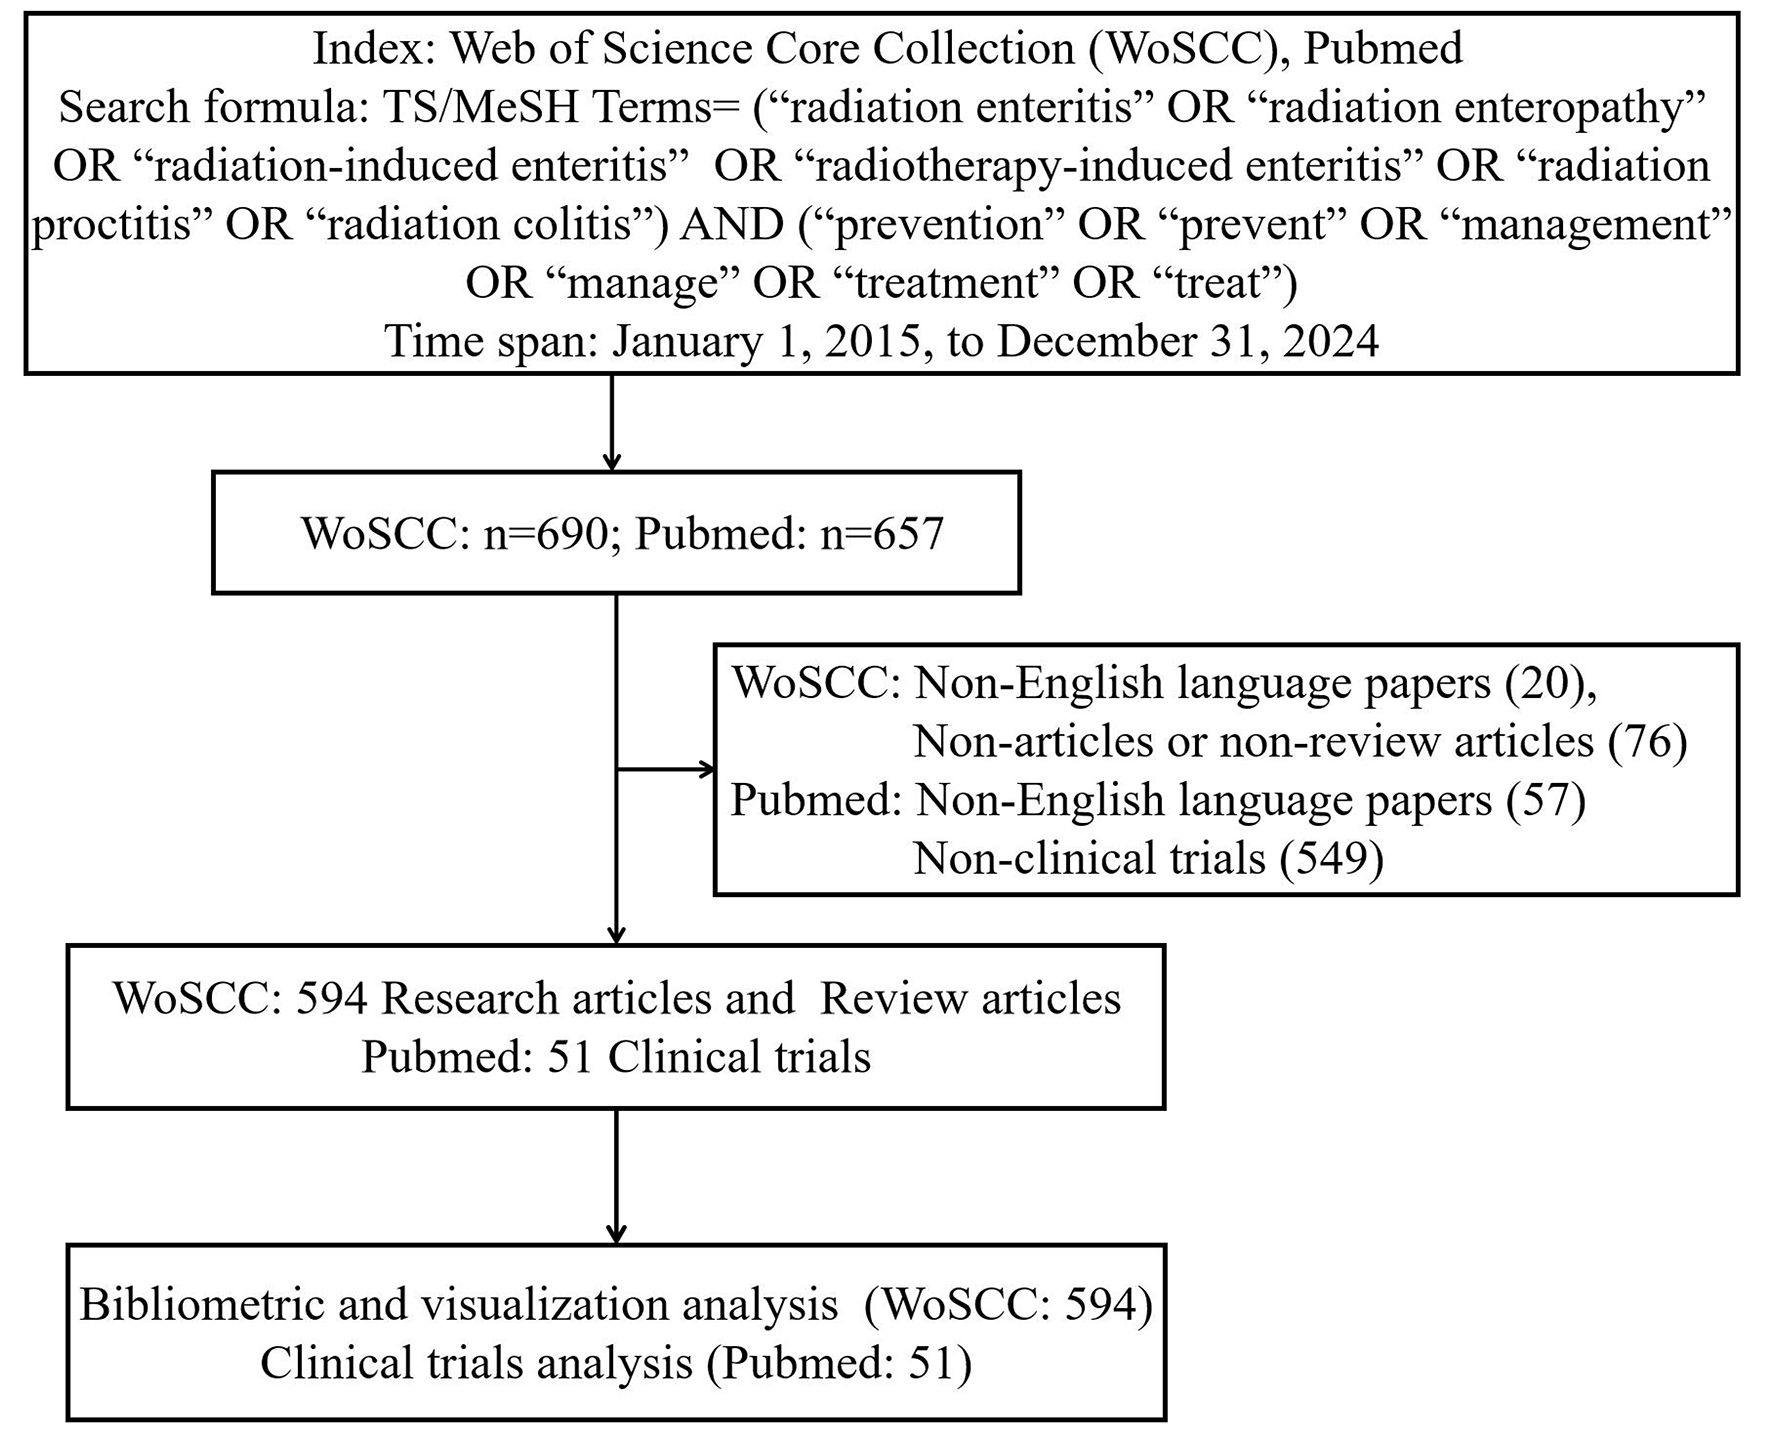


**Supplementary Figure S2. (A)** Map of collaborative network among authors; **(B)** Network diagram of the co-cited authors; **(C)** Network diagram of the co-cited references; **(D)** Map of keyword cluster analysis.


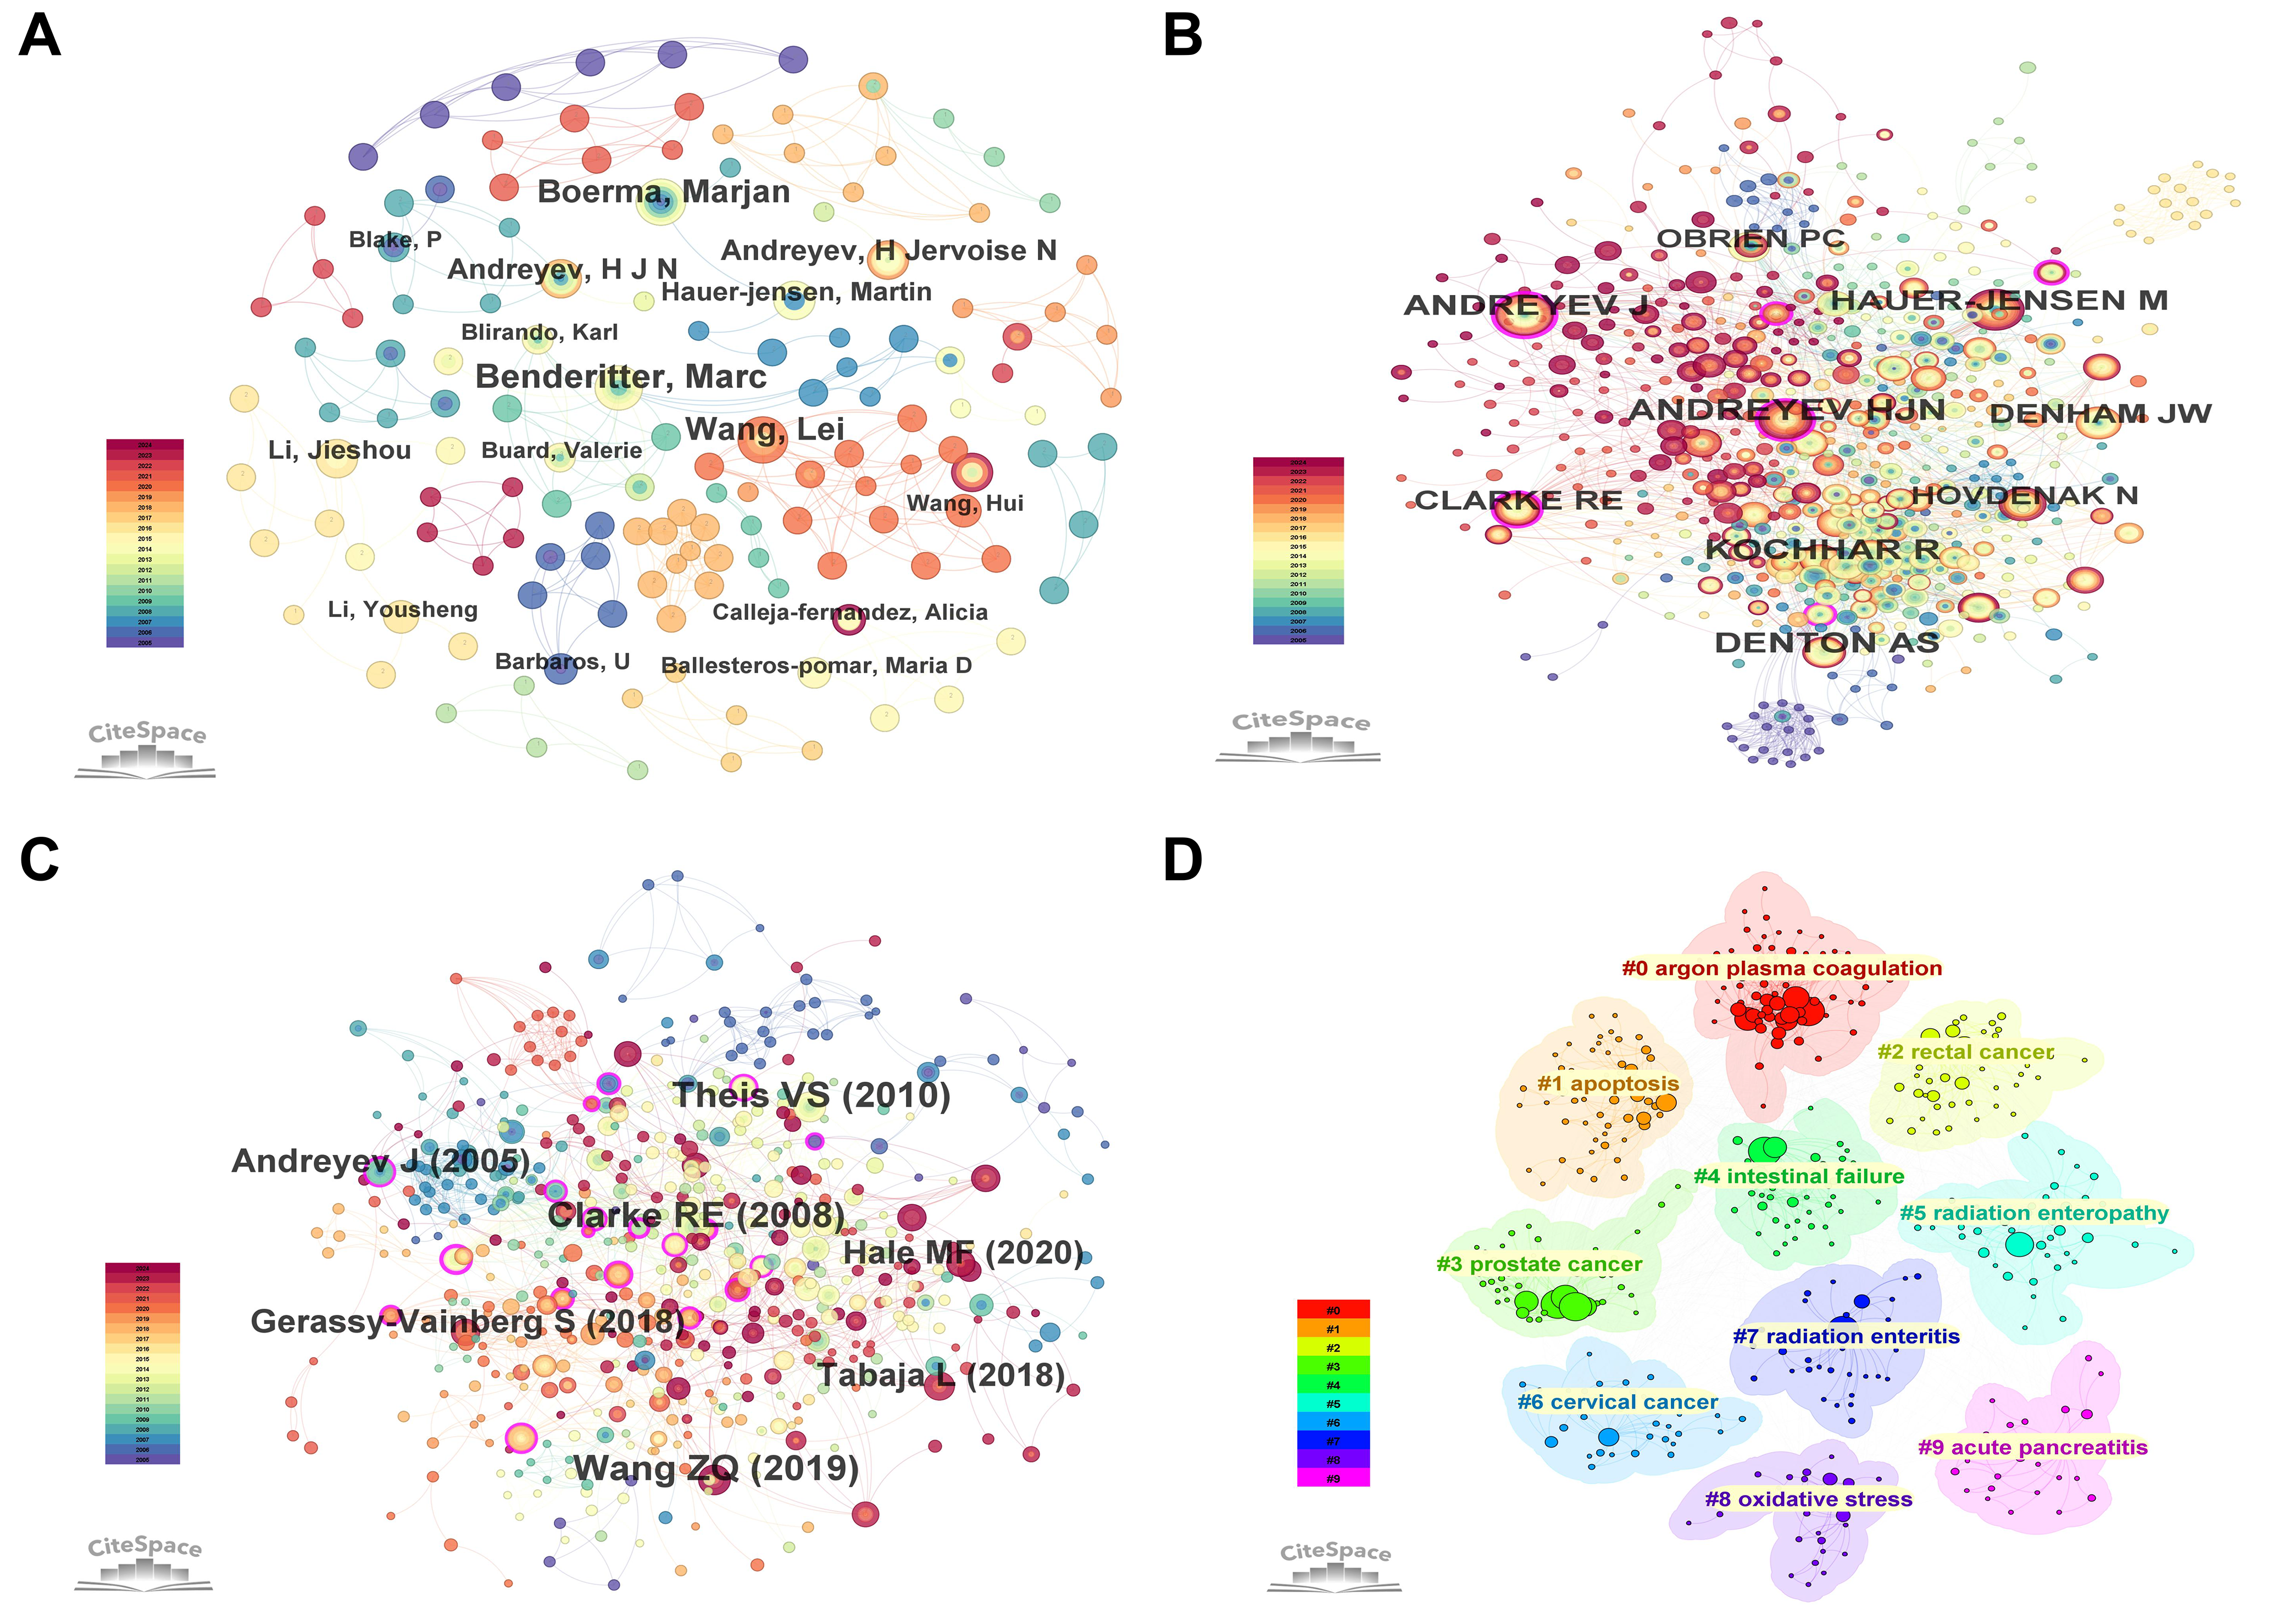


**Table S1** The top 10 countries/regions with the most publications on the prevention and management of radiation enteritis

| **Rank** | **Country** | **Count** | **Citation** | **Average Citation** | **H-Index** | **Centrality** |
| --- | --- | --- | --- | --- | --- | --- |
| 1 | China | 159 | 1949 | 12.26 | 21 | 0.01 |
| 2 | USA | 130 | 5529 | 42.53 | 39 | 0.35 |
| 3 | France | 39 | 2237 | 57.36 | 22 | 0.08 |
| 4 | England | 36 | 2927 | 81.31 | 21 | 0.17 |
| 5 | Italy | 33 | 1350 | 40.91 | 18 | 0.09 |
| 6 | Australia | 32 | 2163 | 67.59 | 20 | 0.05 |
| 7 | Turkey | 32 | 729 | 22.78 | 16 | 0.03 |
| 8 | Japan | 25 | 443 | 17.72 | 12 | 0 |
| 9 | Germany | 24 | 1152 | 48.00 | 15 | 0.1 |
| 10 | Spain | 22 | 972 | 44.18 | 14 | 0.1 |

**Table S2** The top 10 institutions with the most publications on the prevention and management of radiation enteritis

| **Rank** | **Institution** | **Country** | **Count** | **Citation** | **Average Citation** | **H-Index** |
| --- | --- | --- | --- | --- | --- | --- |
| 1 | Universite Paris Cite | France | 18 | 1475 | 81.94 | 13 |
| 2 | Assistance Publique Hopitaux Paris | France | 17 | 1415 | 83.24 | 12 |
| 3 | Sun Yat Sen University | China | 17 | 296 | 17.41 | 8 |
| 4 | Royal Marsden NHS Foundation Trust | England | 14 | 1425 | 101.79 | 12 |
| 5 | Harvard University | USA | 13 | 963 | 74.08 | 8 |
| 6 | Unicancer | France | 13 | 441 | 33.92 | 9 |
| 7 | Harvard University Medical Affiliates | USA | 12 | 962 | 80.17 | 8 |
| 8 | Nanjing University | China | 12 | 94 | 7.83 | 7 |
| 9 | University of Texas System | USA | 12 | 922 | 76.83 | 10 |
| 10 | Chinese Academy of Medical Sciences Peking Union Medical College | China | 10 | 104 | 10.40 | 6 |

**Table S3** The top 10 journals that have published the most articles regarding the prevention and management of radiation enteritis

| **Rank** | **Journal** | **Count** | **Citation** | **Average Citation** | **H-index** | **IF** | **JCI** | **JCR** |
| --- | --- | --- | --- | --- | --- | --- | --- | --- |
| 1 | International Journal of Radiation Oncology Biology Physics | 30 | 1104 | 36.80 | 20 | 6.5 | 1.59 | Q1 |
| 2 | World Journal of Gastroenterology | 24 | 1577 | 65.71 | 13 | 5.4 | 0.91 | Q1 |
| 3 | Colorectal Disease | 13 | 166 | 12.77 | 9 | 2.7 | 0.90 | Q2 |
| 4 | Frontiers in Oncology | 10 | 75 | 7.50 | 5 | 3.3 | 0.68 | Q2 |
| 5 | Radiation Oncology | 10 | 232 | 23.20 | 7 | 3.2 | 0.89 | Q2 |
| 6 | Radiotherapy and Oncology | 10 | 451 | 45.10 | 10 | 5.3 | 1.37 | Q1 |
| 7 | Diseases of the Colon Rectum | 9 | 306 | 34 | 8 | 3.7 | 1.25 | Q1 |
| 8 | Journal of Radiation Research | 9 | 117 | 13 | 7 | 2.0 | 0.54 | Q2 |
| 9 | Digestive Diseases and Sciences | 8 | 256 | 32 | 6 | 2.5 | 0.57 | Q2 |
| 10 | International Journal of Colorectal Disease | 8 | 143 | 17.88 | 5 | 2.3 | 0.81 | Q2 |

**Abbreviations:** IF, Impact Factor (2024); JCI, Journal Citation Indicator (2024); JCR, Journal Citation Reports.

**Table S4** The top 10 most frequently co-cited references on the prevention and management of radiation enteritis

| **Rank** | **Co-cited Reference** | **First Author** | **Year** | **Frequency** | **Centrality** |
| --- | --- | --- | --- | --- | --- |
| 1 | Chronic radiation enteritis. Clin Oncol (R Coll Radiol). doi: 10.1016/j.clon.2009.10.003 | Theis VS | 2010 | 19 | 0.04 |
| 2 | Gut microbial dysbiosis is associated with development and progression of radiation enteritis during pelvic radiotherapy. J Cell Mol Med. doi: 10.1111/jcmm.14289. | Wang ZQ | 2019 | 18 | 0.03 |
| 3 | Hyperbaric oxygen treatment of chronic refractory radiation proctitis: a randomized and controlled double-blind crossover trial with long-term follow-up. Int J Radiat Oncol Biol Phys. doi: 10.1016/j.ijrobp.2007.12.048. | Clarke RE | 2008 | 18 | 0.01 |
| 4 | Gastrointestinal complications of pelvic radiotherapy: are they of any importance? Gut. doi: 10.1136/gut.2004.062596. | Andreyev J | 2005 | 15 | 0.14 |
| 5 | Radiation induces proinflammatory dysbiosis: transmission of inflammatory susceptibility by host cytokine induction. Gut. doi: 10.1136/gutjnl-2017-313789. | Gerassy-Vainberg S | 2018 | 14 | 0.05 |
| 6 | Management of Radiation Proctitis. Dig Dis Sci. doi: 10.1007/s10620-018-5163-8. | Tabaja L | 2018 | 14 | 0.02 |
| 7 | Radiation enteritis: from diagnosis to management. Curr Opin Gastroenterol. doi: 10.1097/MOG.0000000000000632. | Hale MF | 2020 | 14 | 0.02 |
| 8 | Fecal microbiota transplantation: A promising treatment for radiation enteritis? Radiother Oncol. doi: 10.1016/j.radonc.2020.01.011. | Ding X | 2020 | 13 | 0.02 |
| 9 | Clinical Practice Guidelines Committee of The American Society of Colon and Rectal Surgeons. The American Society of Colon and Rectal Surgeons Clinical Practice Guidelines for the Treatment of Chronic Radiation Proctitis. Dis Colon Rectum. doi: 10.1097/DCR.0000000000001209. | Paquette IM | 2018 | 13 | 0.02 |
| 10 | Gastrointestinal radiation injury: symptoms, risk factors and mechanisms. World J Gastroenterol. doi: 10.3748/wjg.v19.i2.185. | Shadad AK | 2013 | 13 | 0.14 |

**Table S5** The top 10 keywords with the most occurrences on the prevention and management of radiation dermatitis

| **Rank** | **Keywords** | **Occurrences** | **Centrality** |
| --- | --- | --- | --- |
| 1 | therapy | 109 | 0.08 |
| 2 | management | 108 | 0.07 |
| 3 | radiotherapy | 105 | 0.11 |
| 4 | radiation proctitis | 100 | 0.08 |
| 5 | radiation enteritis | 97 | 0.22 |
| 6 | injury | 79 | 0.15 |
| 7 | prostate cancer | 73 | 0.08 |
| 8 | argon plasma coagulation | 71 | 0.07 |
| 9 | double blind | 70 | 0.08 |
| 10 | prevention | 55 | 0.1 |

**Table S6** The keyword clustering for prevention and management of radiation enteritis

| **Cluster** | **Size** | **Silhouette** | **Top Term (log-likelihood ratio)** |
| --- | --- | --- | --- |
| #0 argon plasma coagulation | 78 | 0.794 | argon plasma coagulation; radiation proctitis; rectal bleeding; gastrointestinal bleeding; chronic radiation proctitis |
| #1 apoptosis | 55 | 0.809 | apoptosis; expression; paneth cells; radiation proctitis; irradiation |
| #2 rectal cancer | 50 | 0.86 | rectal cancer; cervical cancer; colorectal cancer; chemoradiotherapy; radiation therapy |
| #3 prostate cancer | 46 | 0.81 | prostate cancer; acute proctitis; acute radiation proctitis; aloe vera; conformal radiotherapy |
| #4 intestinal failure | 44 | 0.782 | intestinal failure; home parenteral nutrition; short bowel syndrome; enterocutaneous fistula; surgery |
| #5 radiation enteropathy | 42 | 0.719 | radiation enteropathy; intestinal microbiota; acute toxicity; probiotics; endothelial dysfunction |
| #6 cervical cancer | 36 | 0.799 | cervical cancer; concurrent chemoradiotherapy; 2nd malignancy; body mass index; randomized trial |
| #7 radiation enteritis | 32 | 0.653 | radiation enteritis; meta-analysis; prostate cancer; interleukin-6; molecular feature |
| #8 oxidative stress | 27 | 0.816 | oxidative stress; fibroblasts; small intestine; coenzyme q10; rat |
| #9 acute pancreatitis | 24 | 0.838 | acute pancreatitis; symptoms; inflammatory bowel diseases; remote ischemic preconditioning; precision-cut tissue slices |
